# Supplementary material for: Sources and physicochemical characteristics of black carbon aerosol in the southeastern Tibetan Plateau: internal mixing enhances light absorption
Source: Copernicus journal article supplement (doi:10.5194/acp-2017-801), 2017-11-21
Supplement: Supplementary file [file acp-2017-801-AC1-supplement.pdf]

## **Anonymous Referee #2**

Totally this MS has been greatly improved. However, there are still some problems in the MS. Firstly, the English still need to be further improved. Some sentences are a little long and need to be cut into short sentences. Secondly, some inconsistent tenses exist in some sentences, please check carefully.

**Response:** We thank the reviewer for taking the time to review our manuscript. We have revised most of the long sentences to the shorter ones, and the tenses also have been checked carefully. The language has been further proofed by a native English speaker.

This study only cover less than two months in autumn of 2015. Due to radiative and atmospheric chemistry at study area should be different at other seasons, the conclusion of this study should be limited and the uncertainties need also be pointed out in the MS.

**Response:** In the revised manuscript, we added the following in the conclusion section to clarify the limitation and uncertainties caused by the short sampling period: “We should note that the sources, transport, and radiative effects of the rBC as well as atmospheric conditions likely vary in complex ways with season, and therefore the results from our study (in autumn) are not necessarily representative of other times of the year. Indeed, additional studies need to be conducted to determine how the rBC aerosol at our site and others changes with season.”
